# Supplementary material
Source: publisher figshare collection journal article supplement (https://frontiersin.figshare.com/ndownloader/files/26190419)
Supplement: Supplementary file [file 26190419]

Supplementary Table 1.A. Median, quartiles, minimum and maximum values in the negative and positive severity and mortality groups.

|                | Negative | Negative Mild | Negative ICU | Negative Mort | Positive | Positive Mild | Positive ICU | Positive Mort |
|----------------|----------|---------------|--------------|---------------|----------|---------------|--------------|---------------|
| Min            | 0,0      | 0,0           | 0,0          | 29,0          | 18,0     | 18,0          | 61,0         | 61,0          |
| Q1             | 35,0     | 35,0          | 54,0         | 63,0          | 37,0     | 35,5          | 63,5         | 63,3          |
| Median         | 52,0     | 52,0          | 64,0         | 71,5          | 49,5     | 46,0          | 68,0         | 68,0          |
| Q3             | 69,0     | 68,0          | 75,0         | 79,0          | 62,8     | 59,5          | 70,0         | 75,8          |
| Max            | 98,0     | 98,0          | 91,0         | 96,0          | 87,0     | 81,0          | 87,0         | 87,0          |
| IQR            | 34,0     | 33,0          | 21,0         | 16,0          | 25,8     | 24,0          | 6,5          | 12,5          |
| Upper Outliers | 0,0      | 0,0           | 0,0          | 0,0           | 0,0      | 0,0           | 1,0          | 0,0           |
| Lower Outliers | 0,0      | 0,0           | 7,0          | 2,0           | 0,0      | 0,0           | 0,0          | 0,0           |

Supplementary Table 1.B. . Sex distribution, symptoms, severity and mortality among positive cases in the normal population and healthcare personnel groups.

|                   | men | women | non-symp | symp | ICU | non-ICU | mortality | no mortality |
|-------------------|-----|-------|----------|------|-----|---------|-----------|--------------|
| normal population | 41  | 29    | 12       | 58   | 7   | 63      | 4         | 66           |
| healthcare pers   | 6   | 10    | 8        | 8    | 0   | 16      | 0         | 16           |

Supplementary Table 1.C. Sex distribution, symptoms, severity and mortality in the negative and positive groups.

|          | men  | women | non-symp | symp | ICU | non-ICU | mortality | no mortality |
|----------|------|-------|----------|------|-----|---------|-----------|--------------|
| Negative | 1696 | 1875  | 1411     | 2157 | 93  | 3478    | 54        | 3517         |
| Positive | 46   | 40    | 20       | 66   | 7   | 79      | 4         | 82           |

Supplementary Table 1.D. First, second and third test positivity in the normal population.

|          | 1st test | 2nd and 3rd test | Total |
|----------|----------|------------------|-------|
| Negative | 3048     | 1555             | 4603  |
| Positive | 65       | 5                | 70    |
| Total    | 3113     | 1560             | 4673  |

healthcare pers: healthcare personnel; ICU: intensive care unit admission; mort: mortality; non-symp: non-symptomatic; symp: symptomatic
